# Supplementary material for: Calixazulenes: azulene-based calixarene analogues – an overview and recent supramolecular complexation studies
Source: PubMed Central journal article supplement (PMC6178307; doi:10.3762/bjoc.14.225), 2018-09-25
Supplement: Beilstein_J_Org_Chem-14-2488-s001.pdf [file Beilstein_J_Org_Chem-14-2488-s001.pdf]

## Supporting Information

for

# Calixazulenes: azulene-based calixarene analogues – an overview and recent supramolecular complexation studies

Paris E. Georghiou<sup>\*1</sup>, Shofiur Rahman<sup>1,2</sup>, Abdullah Alodhayb<sup>2,3</sup>, Hidetaka Nishimura<sup>4</sup>, Jaehyun Lee<sup>4</sup>, Atsushi Wakamiya<sup>4</sup> and Lawrence T. Scott<sup>5</sup>

Address: <sup>1</sup>Department of Chemistry, Memorial University of Newfoundland, St. John's, Newfoundland and Labrador, Canada A1B 3X7, <sup>2</sup>Aramco Laboratory for Applied Sensing Research, King Abdullah Institute for Nanotechnology, King Saud University, Riyadh, Saudi Arabia, <sup>3</sup>Department of Physics and Astronomy, College of Science, King Saud University, Riyadh 11451, Saudi Arabia, <sup>4</sup>Institute for Chemical Research, Kyoto University, Uji, Japan and <sup>5</sup>Merkert Chemistry Center, Boston College, Chestnut Hill, MA, 02467 USA.

Email: Paris E. Georghiou - parisg@mun.ca

\*Corresponding author

## Experimental determination of binding constants and DFT calculations

### Table of contents

|                                                                                                      | <u>Page</u> |
|------------------------------------------------------------------------------------------------------|-------------|
| Figure S1: UV-vis spectra of <b>5</b> showing 1:1 binding model for <b>5</b> with TBACl              | S2          |
| Figure S2: UV-vis spectra of <b>5</b> showing 1:1 binding model for <b>5</b> with TBABr              | S3          |
| Figure S3: UV-vis spectra of <b>5</b> showing 1:1 binding model for <b>5</b> with TBAI               | S4          |
| Figure S4: UV-vis spectra of <b>5</b> showing 1:1 binding model for <b>5</b> with TMABF <sub>4</sub> | S5          |
| Figure S5: UV-vis spectra of <b>5</b> showing 1:1 binding model for <b>5</b> with TEABF <sub>4</sub> | S6          |
| Figure S6: UV-vis spectra of <b>5</b> showing 1:1 binding model for <b>5</b> with TBABF <sub>4</sub> | S7          |
| References                                                                                           | S7          |
| Table S11 DFT calculations                                                                           | S8          |

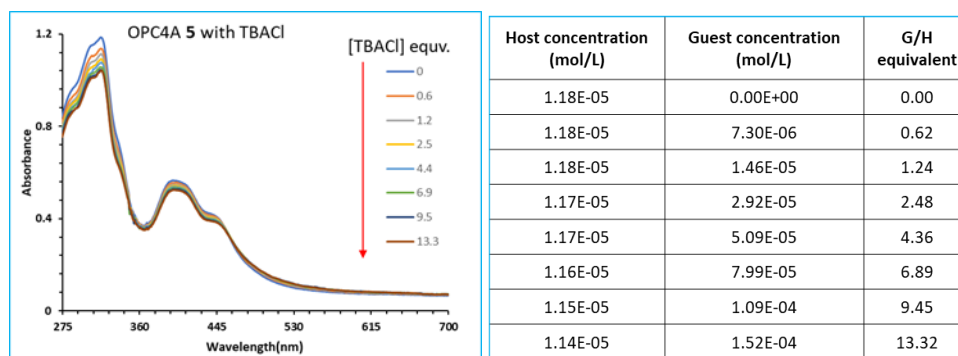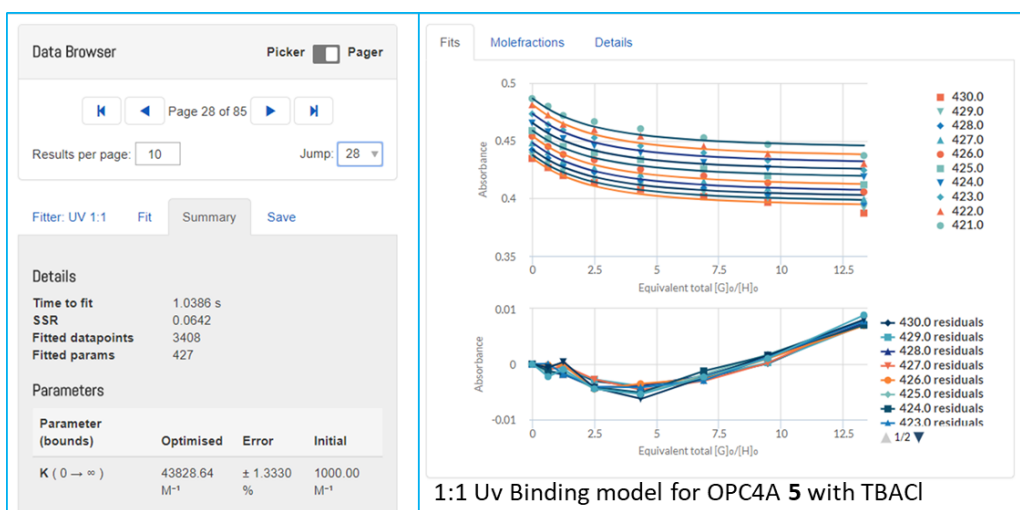

**Figure S1:** *Top: (left and right side):* UV-vis spectra of OPC4A 5 ( $1.18 \times 10^{-5}$  M to  $1.14 \times 10^{-5}$  M) upon addition of TBACl (0–13 equivalents) in 9:1, v/v  $\text{CH}_2\text{Cl}_2/\text{CH}_3\text{OH}$ . *Bottom:* Screenshot from <http://app.supramolecular.org/bindfit/> showing 1:1 binding model for OPC4A 5 with TBACl.

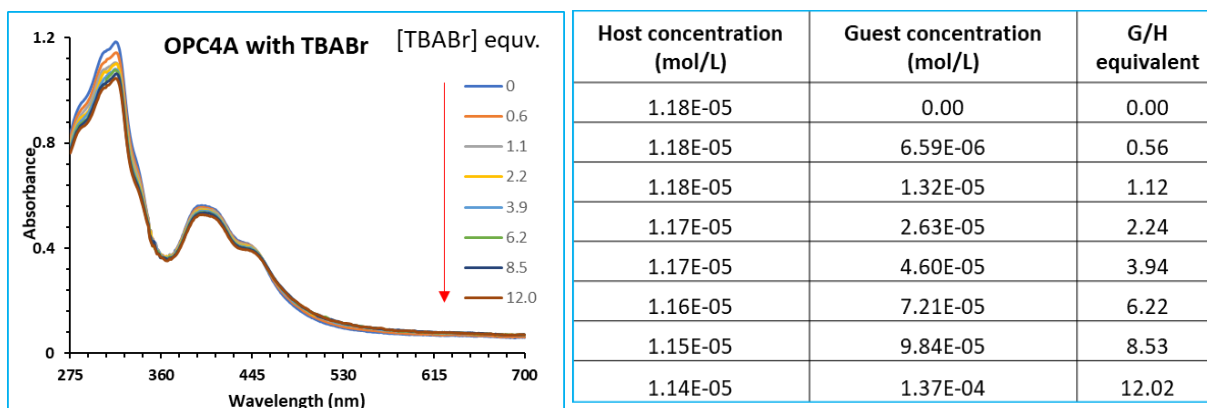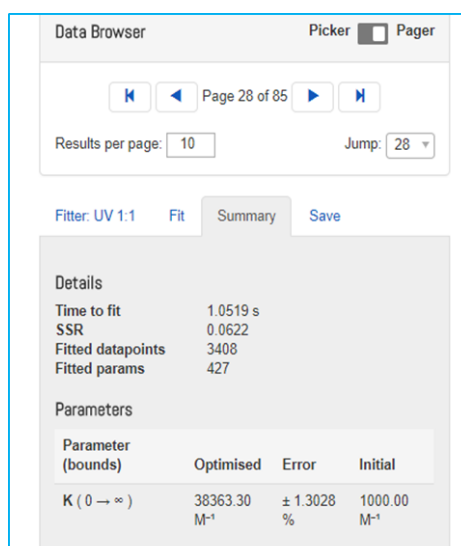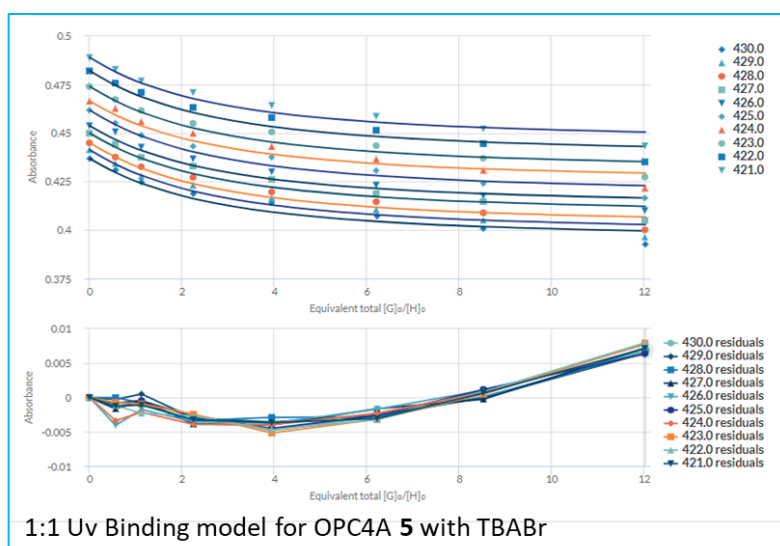

**Figure S2:** *Top: (left and right side):* UV-vis spectra of OPC4A 5 ( $1.18 \times 10^{-5}$  M to  $1.14 \times 10^{-5}$  M) upon addition of TBABr (0–12 equivalents) in 9:1, v/v  $\text{CH}_2\text{Cl}_2/\text{CH}_3\text{OH}$ . *Bottom:* Screenshot from <http://app.supramolecular.org/bindfit/> showing 1:1 binding model for OPC4A 5 with TBABr.

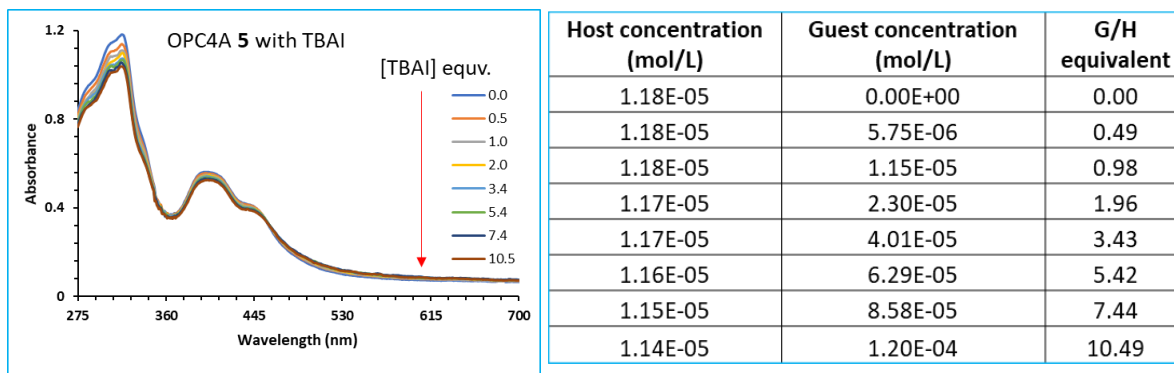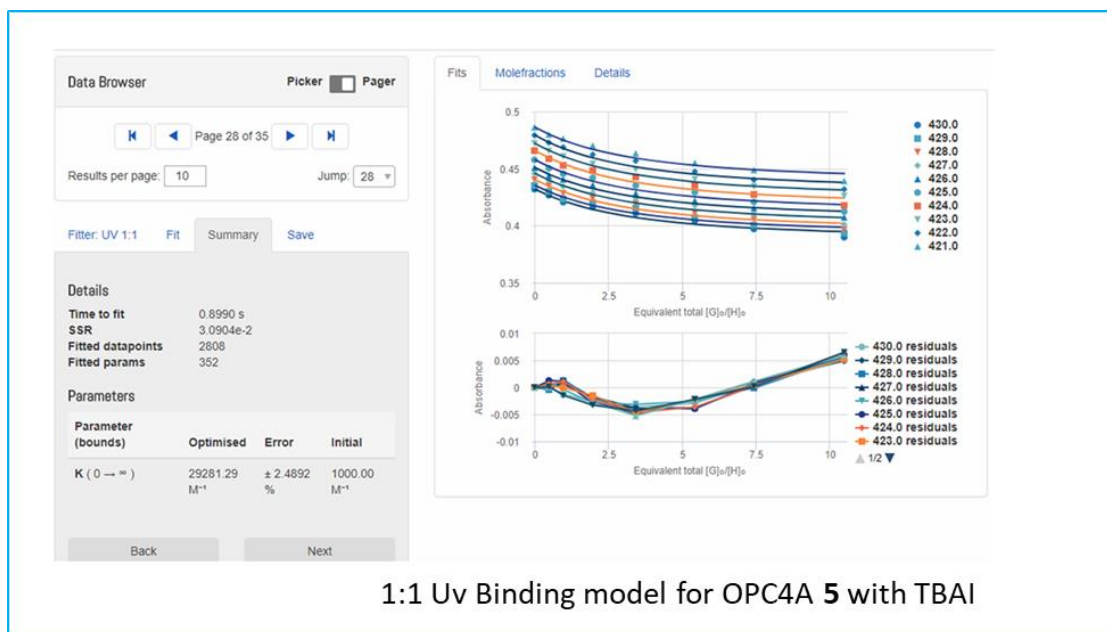

**Figure S3:** *Top: (left and right side):* UV-vis spectra of OPC4A 5 ( $1.18 \times 10^{-5}$  M to  $1.14 \times 10^{-5}$  M) upon addition of TBAI (0–10.4 equivalents) in 9:1, v/v  $\text{CH}_2\text{Cl}_2/\text{CH}_3\text{OH}$ . *Bottom:* Screenshot from <http://app.supramolecular.org/bindfit/> showing 1:1 binding model for OPC4A 5 with TBAI.

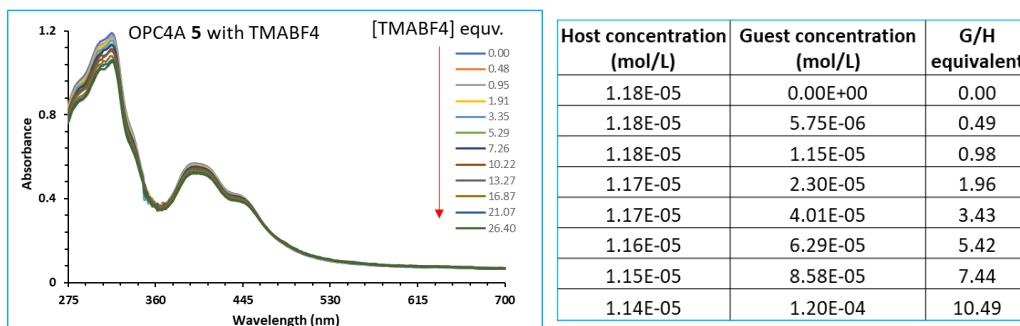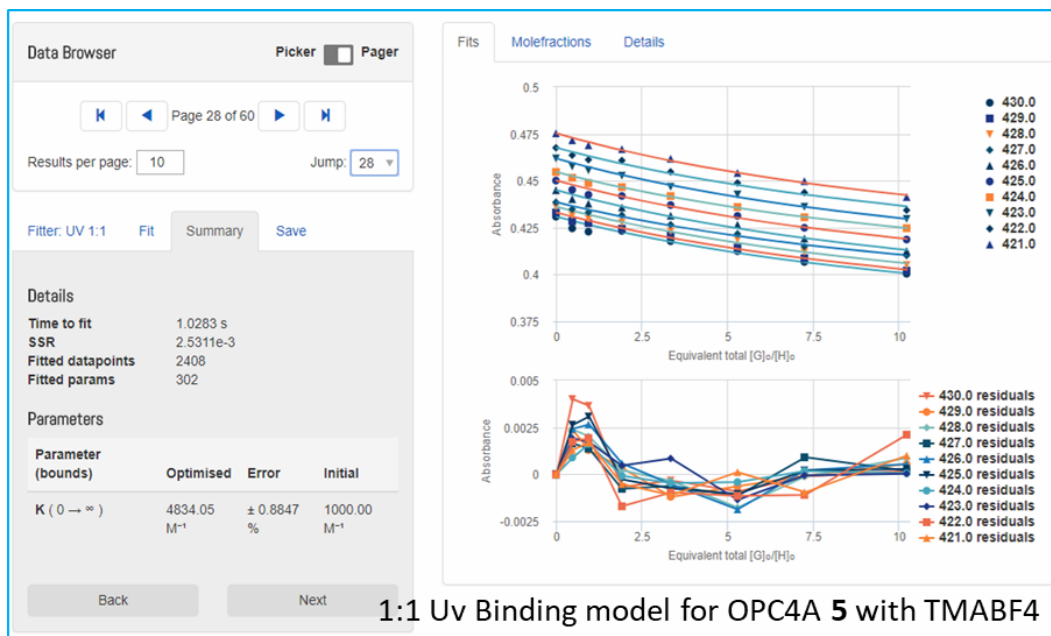

**Figure S4:** *Top: (left and right side):* UV-vis spectra of OPC4A 5 ( $1.18 \times 10^{-5}$  M to  $1.14 \times 10^{-5}$  M) upon addition of TMABF<sub>4</sub> (0–10 equivalents) in 9:1,v/v CH<sub>2</sub>Cl<sub>2</sub>/CH<sub>3</sub>OH. *Bottom:* Screenshot from <http://app.supramolecular.org/bindfit/> showing 1:1 binding model for OPC4A 5 with TMABF<sub>4</sub>

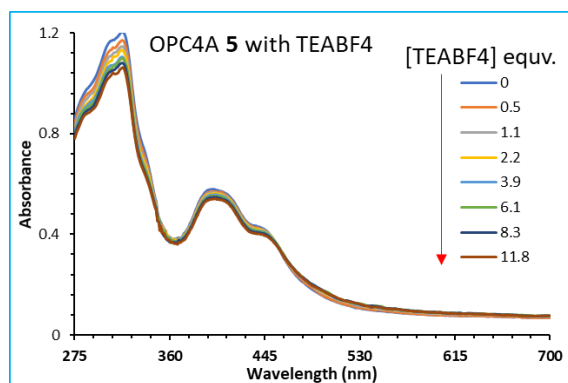

| Host concentration (mol/L) | Guest concentration (mol/L) | G/H equivalent |
|----------------------------|-----------------------------|----------------|
| 1.18E-05                   | 0.00E+00                    | 0.00           |
| 1.18E-05                   | 6.45E-06                    | 0.55           |
| 1.18E-05                   | 1.29E-05                    | 1.10           |
| 1.17E-05                   | 2.58E-05                    | 2.19           |
| 1.17E-05                   | 4.50E-05                    | 3.85           |
| 1.16E-05                   | 7.06E-05                    | 6.08           |
| 1.15E-05                   | 9.62E-05                    | 8.35           |
| 1.14E-05                   | 1.34E-04                    | 11.76          |

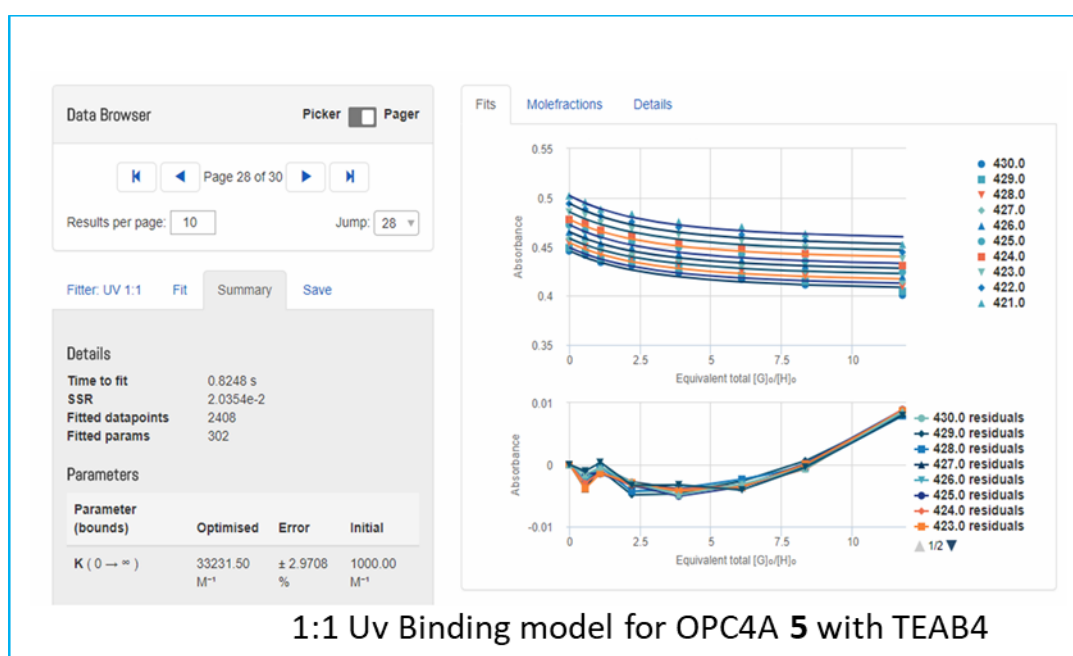

**Figure S5:** *Top: (left and right side):* UV-vis spectra of OPC4A 5 ( $1.18 \times 10^{-5}$  M to  $1.14 \times 10^{-5}$  M) upon addition of TEABF<sub>4</sub> (0–12 equivalents) in 9:1, v/v CH<sub>2</sub>Cl<sub>2</sub>/CH<sub>3</sub>OH. *Bottom:* Screenshot from <http://app.supramolecular.org/bindfit/> showing 1:1 binding model for OPC4A 5 with TEABF<sub>4</sub>

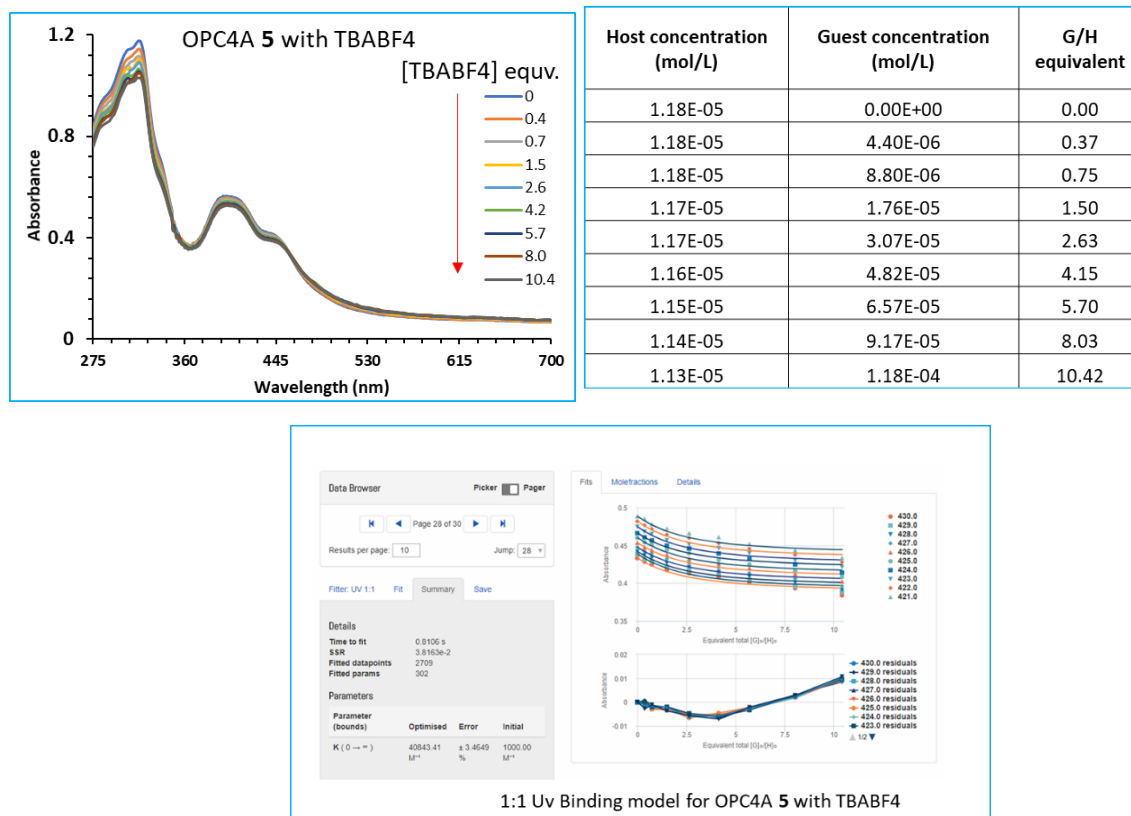

**Figure S6:** *Top: (left and right side):* UV-vis spectra of OPC4A 5 ( $1.18 \times 10^{-5}$  M to  $1.14 \times 10^{-5}$  M) upon addition of TBABF<sub>4</sub> (0–10 equivalents) in 9:1, v/v CH<sub>2</sub>Cl<sub>2</sub>/CH<sub>3</sub>OH. *Bottom:* Screenshot from <http://app.supramolecular.org/bindfit/> showing 1:1 binding model for OPC4A 5 with TBABF<sub>4</sub>.

## References

1. (a) P. Thordarson, *Chem. Soc. Rev.*, 2011, **40**, 1305-1323; (b) <http://app.supramolecular.org/bindfit/>

Table SI1. DFT Calculations

| Job Number | Job Name                                    | Route                                                                 | Stoichiometry | RwB97XD Energy (Hartree) | 2600            |               |
|------------|---------------------------------------------|-----------------------------------------------------------------------|---------------|--------------------------|-----------------|---------------|
| 55985      | OPCA Cone Gen ECP PLUS DCM ex 5253          | #N wB97xD/GenECP OPT SCRF=(PCM,Solvent=Dichloromethane) Geom=Check    | C92H64        | -3543.05966532           |                 |               |
| 55980      | TBACl in DCM wB97xD/GenECP from 2327        | #N wB97xD/GenECP OPT SCRF=(PCM,Solvent=Dichloromethane) Geom=Check    | C16H36ClN     | -700.9470509             |                 |               |
|            |                                             |                                                                       |               | -4244.006716             |                 |               |
| 56212      | Scott cone plus TBACl in DCM ex 5643        | #N wB97xD/GenECP OPT SCRF=(PCM,Solvent=Dichloromethane) Geom=Check    | C108H100ClN   | -4244.136641             |                 |               |
|            |                                             |                                                                       |               | -0.129925185             | <b>-337.805</b> | <b>kJ/mol</b> |
| 55985      | OPCA Cone Gen ECP PLUS DCM ex 5253          | #N wB97xD/GenECP OPT SCRF=(PCM,Solvent=Dichloromethane) Geom=Check    | C92H64        | -3543.05966532           |                 |               |
| 55977      | TBAbR in DCM wB97xD/GenECP from 2327        | #N wB97xD/GenECP OPT SCRF=(PCM,Solvent=Dichloromethane) Geom=Check    | C16H36BrN     | -699.1793985             |                 |               |
|            |                                             |                                                                       |               | -4242.239064             |                 |               |
| 56210      | Scott cone plus TBAbR in DCM                | #N wB97xD/GenECP OPT SCRF=(PCM,Solvent=Dichloromethane) Geom=Check    | C108H100BrN   | -4242.36025              |                 |               |
|            |                                             |                                                                       |               | -0.12118209              | <b>-315.073</b> | <b>kJ/mol</b> |
| 55985      | OPCA Cone Gen ECP PLUS DCM ex 5253          | #N wB97xD/GenECP OPT SCRF=(PCM,Solvent=Dichloromethane) Geom=Check    | C92H64        | -3543.05966532           |                 |               |
| 56061      | TBAI in DCM Gen ECP wB97xD/6-31G(d) from 23 | #N wB97xD/GenECP OPT SCRF=(PCM,Solvent=Dichloromethane) Geom=Check    | C16H36IN      | -697.4036638             |                 |               |
|            |                                             |                                                                       |               | -4240.463329             |                 |               |
| 56196      | Scott plus TBAI and DCM ex 5484 new         | #N wB97xD/GenECP OPT SCRF=(PCM,Solvent=Dichloromethane) Geom=Check    | C108H100IN    | -4240.585022             |                 |               |
|            |                                             |                                                                       |               | -0.121692956             | <b>-316.402</b> | <b>kJ/mol</b> |
| 6021       | OPCA Cone PLUS DCM ex 5253                  | #N wB97xD/6-31G(d) OPT SCRF=(PCM,Solvent=Dichloromethane) Geom=Connec | C92H64        | -3543.110208             |                 |               |
| 6027       | TMABF4 in DCM wB97xD/6-31G9d) from 2275     | #N wB97xD/6-31G(d) OPT SCRF=(PCM,Solvent=Dichloromethane) Geom=Connec | C4H12BF4N     | -638.6789257             |                 |               |
|            |                                             |                                                                       |               | -4181.789133             |                 |               |
| 6015       | SCOTT + TMABF4 + DCM ex 5174                | #N wB97xD/6-31G(d) OPT SCRF=(PCM,Solvent=Dichloromethane) Geom=Check  | C96H76BF4N    | -4181.849108             |                 |               |
|            |                                             |                                                                       |               | -0.05997502              | <b>-155.935</b> | <b>kJ/mol</b> |
| 6021       | OPCA Cone PLUS DCM ex 5253                  | #N wB97xD/6-31G(d) OPT SCRF=(PCM,Solvent=Dichloromethane) Geom=Connec | C92H64        | -3543.110208             |                 |               |
| 6026       | TEABF4 in DCM wB97xD/6-31G(d) from 2298     | #N wB97xD/6-31G(d) OPT SCRF=(PCM,Solvent=Dichloromethane) Geom=Connec | C8H20BF4N     | -795.8947434             |                 |               |
|            |                                             |                                                                       |               | -4339.004951             |                 |               |
| 5994       | OPCA cone plus TEABF4 in DCM                | #N wB97xD/6-31G(d) OPT SCRF=(PCM,Solvent=Dichloromethane) Geom=Connec | C100H84BF4N   | -4339.06834              |                 |               |
|            |                                             |                                                                       |               | -0.063389111             | <b>-164.812</b> | <b>kJ/mol</b> |
| 6021       | OPCA Cone PLUS DCM ex 5253                  | #N wB97xD/6-31G(d) OPT SCRF=(PCM,Solvent=Dichloromethane) Geom=Connec | C92H64        | -3543.110208             |                 |               |
| 6022       | TBABF4 in DCM wB97xD/6-31G(d) from 2359     | #N wB97xD/6-31G(d) OPT SCRF=(PCM,Solvent=Dichloromethane) Geom=Connec | C16H36BF4N    | -1110.3206               |                 |               |
|            |                                             |                                                                       |               | -4653.430808             |                 |               |
| 6014       | OPCA plusTBABF4 in DCM EX 5173              | #N wB97xD/6-31G(d) OPT SCRF=(PCM,Solvent=Dichloromethane) Geom=Check  | C108H100BF4N  | -4653.507282             |                 |               |
|            |                                             |                                                                       |               | -0.07647396              | <b>-198.832</b> | <b>kJ/mol</b> |

Note: 1 Hartree = 2600 kJ/mol
